# Supplementary material
Source: PubMed Central journal article supplement (PMC2875688)
Supplement: NIHMS89049-supplement-01.pdf [file NIHMS89049-supplement-01.pdf]

## Supplementary Material

### **First-principle studies of intermolecular and intramolecular catalysis of protonated cocaine**

**Chang-Guo Zhan,<sup>\*,†,‡</sup> Shi-Xian Deng,<sup>†</sup> Jaime G. Skiba,<sup>§</sup> Beth A. Hayes,<sup>§</sup> Sarah M. Tschampel,<sup>§</sup> George C. Shields,<sup>\*,§</sup> and Donald W. Landry<sup>\*,†</sup>**

*Division of Clinical Pharmacology and Experimental Therapeutics, College of Physicians & Surgeons, Columbia University, 630 West 168th Street, New York, NY 10032, Department of Pharmaceutical Sciences, College of Pharmacy, University of Kentucky, Rose Street, Lexington, KY 40536, and Department of Chemistry, Hamilton College, 198 College Hill Road, Clinton, NY 13323.*

**Supporting Information Available.** Cartesian coordinates of the geometries optimized at the B3LYP/6-31+G\* level and the corresponding energies.

All coordinates in Å and all energies in a.u. (Hartree).

#### **HO<sup>-</sup>**

|               |   |          |          |                |
|---------------|---|----------|----------|----------------|
| 1             | 8 | 0.000000 | 0.000000 | 0.107908       |
| 2             | 1 | 0.000000 | 0.000000 | -0.863265      |
| B3LYP/6-31+G* |   |          |          | -75.7966808980 |

#### **Cocaine protonated (chair conformation)**

|   |   |           |           |           |
|---|---|-----------|-----------|-----------|
| N | 7 | -3.394769 | 0.201048  | 0.536295  |
| C | 6 | -3.271754 | -1.360659 | -1.282852 |
| C | 6 | -3.379477 | -2.144357 | 0.060041  |
| C | 6 | -2.976081 | -1.130007 | 1.152357  |
| H | 1 | -3.517242 | -1.259342 | 2.092679  |
| C | 6 | -1.461729 | -1.056116 | 1.401499  |
| C | 6 | -0.689073 | -0.853492 | 0.091684  |
| H | 1 | -0.691399 | -1.772494 | -0.500067 |

\* Corresponding authors

† Columbia University

‡ University of Kentucky

§ Hamilton College

|               |   |           |           |                |
|---------------|---|-----------|-----------|----------------|
| C             | 6 | -1.313643 | 0.261454  | -0.805847      |
| H             | 1 | -0.899321 | 0.158512  | -1.811899      |
| C             | 6 | -2.847790 | 0.069286  | -0.883130      |
| H             | 1 | -2.544740 | -1.799691 | -1.970946      |
| H             | 1 | -4.230350 | -1.342795 | -1.808486      |
| H             | 1 | -4.396981 | -2.510318 | 0.222421       |
| H             | 1 | -2.723535 | -3.018297 | 0.089584       |
| H             | 1 | -1.234739 | -0.244592 | 2.103124       |
| H             | 1 | -1.134835 | -1.987306 | 1.875882       |
| H             | 1 | -3.302335 | 0.848093  | -1.500377      |
| C             | 6 | -4.857619 | 0.497138  | 0.612333       |
| H             | 1 | -5.041226 | 1.465580  | 0.142914       |
| H             | 1 | -5.425240 | -0.279135 | 0.099356       |
| H             | 1 | -5.149168 | 0.537742  | 1.663624       |
| C             | 6 | -0.960607 | 1.648853  | -0.277085      |
| C             | 6 | 1.612162  | -0.864996 | -0.520879      |
| O             | 8 | 1.287969  | -1.317681 | -1.601174      |
| O             | 8 | 0.664008  | -0.553156 | 0.435688       |
| C             | 6 | 4.616497  | 0.115621  | 1.579825       |
| H             | 1 | 4.847049  | 0.478741  | 2.577344       |
| C             | 6 | 3.290717  | -0.114494 | 1.214673       |
| H             | 1 | 2.491033  | 0.065700  | 1.924882       |
| C             | 6 | 2.993822  | -0.590149 | -0.074253      |
| C             | 6 | 4.032801  | -0.832864 | -0.989052      |
| H             | 1 | 3.788911  | -1.204234 | -1.979244      |
| C             | 6 | 5.355017  | -0.599404 | -0.617817      |
| H             | 1 | 6.156799  | -0.788567 | -1.325679      |
| C             | 6 | 5.647904  | -0.125627 | 0.665828       |
| H             | 1 | 6.679950  | 0.053138  | 0.955077       |
| O             | 1 | -2.875440 | 0.994258  | 0.969294       |
| O             | 8 | -1.542347 | 2.169379  | 0.674202       |
| O             | 8 | 0.029212  | 2.213604  | -0.940903      |
| C             | 6 | 0.484711  | 3.519164  | -0.485134      |
| H             | 1 | -0.334901 | 4.237312  | -0.548093      |
| H             | 1 | 0.842391  | 3.443247  | 0.543201       |
| H             | 1 | 1.292804  | 3.783826  | -1.164306      |
| B3LYP/6-31+G* |   |           |           | -1016.55234388 |

**Cocaine protonated (boat conformation)**

|   |   |           |           |           |
|---|---|-----------|-----------|-----------|
| 1 | 6 | -2.677392 | 0.352101  | 0.549318  |
| 2 | 6 | -4.004256 | -1.036069 | -0.973028 |
| 3 | 6 | -2.606924 | -1.639501 | -0.699398 |
| 4 | 7 | -2.259317 | -1.097800 | 0.675218  |
| 5 | 8 | -0.429152 | 1.703969  | 1.653246  |
| 6 | 6 | -1.656868 | 1.101050  | -0.350104 |
| 7 | 8 | 0.562852  | 0.115509  | -1.052624 |

|               |   |           |                |           |
|---------------|---|-----------|----------------|-----------|
| 8             | 6 | -1.501300 | -1.174824      | -1.677129 |
| 9             | 6 | -0.858286 | 0.208428       | -1.369083 |
| 10            | 8 | 0.396711  | -1.374372      | 0.651126  |
| 11            | 6 | 2.561432  | -0.679124      | -0.081768 |
| 12            | 6 | 3.317236  | 0.036530       | -1.028490 |
| 13            | 6 | 4.708690  | 0.006713       | -0.966898 |
| 14            | 6 | 5.350927  | -0.730848      | 0.034157  |
| 15            | 6 | 4.601681  | -1.443022      | 0.977543  |
| 16            | 6 | 3.210650  | -1.420701      | 0.921671  |
| 17            | 8 | -0.223469 | 2.976714       | -0.208888 |
| 18            | 6 | 0.725287  | 3.844857       | 0.465937  |
| 19            | 6 | -2.886516 | -1.827043      | 1.817999  |
| 20            | 1 | -2.227926 | 1.803751       | -0.964611 |
| 21            | 6 | -4.075266 | 0.241455       | -0.089426 |
| 22            | 1 | -2.679231 | 0.793314       | 1.546823  |
| 23            | 1 | -4.793800 | -1.744263      | -0.706260 |
| 24            | 1 | -4.126397 | -0.818188      | -2.037168 |
| 25            | 1 | -2.620159 | -2.730443      | -0.648376 |
| 26            | 1 | -0.704883 | -1.922166      | -1.715881 |
| 27            | 1 | -1.935079 | -1.143117      | -2.681263 |
| 28            | 1 | -0.796508 | 0.775980       | -2.295850 |
| 29            | 1 | 2.817179  | 0.604008       | -1.805536 |
| 30            | 1 | 5.293515  | 0.555216       | -1.699449 |
| 31            | 1 | 6.436341  | -0.751284      | 0.078197  |
| 32            | 1 | 5.102775  | -2.013824      | 1.753694  |
| 33            | 1 | 2.617213  | -1.967050      | 1.647186  |
| 34            | 1 | -2.502545 | -2.849021      | 1.823979  |
| 35            | 1 | -3.971837 | -1.838868      | 1.715337  |
| 36            | 1 | -2.602321 | -1.323554      | 2.744004  |
| 37            | 1 | 0.965163  | 4.619119       | -0.261029 |
| 38            | 1 | 0.265487  | 4.273723       | 1.358503  |
| 39            | 1 | 1.615593  | 3.275848       | 0.741728  |
| 40            | 1 | -4.843976 | 0.144765       | 0.682714  |
| 41            | 1 | -4.319991 | 1.140449       | -0.660305 |
| 42            | 6 | -0.699569 | 1.949753       | 0.495633  |
| 43            | 1 | -1.215749 | -1.165521      | 0.791817  |
| 44            | 6 | 1.088277  | -0.691226      | -0.106544 |
| B3LYP/6-31+G* |   |           | -1016.54210876 |           |

**TS1<sub>ben</sub>-Re**

|   |   |          |           |           |
|---|---|----------|-----------|-----------|
| 1 | 6 | 2.660840 | 0.071103  | 1.019318  |
| 2 | 6 | 3.042165 | -2.227787 | 0.218474  |
| 3 | 6 | 3.024966 | -1.211958 | -0.948454 |
| 4 | 1 | 3.185750 | 0.912899  | -0.796591 |
| 5 | 6 | 1.178535 | 1.844219  | 0.013827  |
| 6 | 6 | 1.224828 | 0.462650  | 0.626492  |

|               |   |           |           |                |
|---------------|---|-----------|-----------|----------------|
| 7             | 8 | -0.627751 | -0.253473 | -0.758714      |
| 8             | 6 | 1.616902  | -0.937280 | -1.504052      |
| 9             | 6 | 0.667886  | -0.625703 | -0.341843      |
| 10            | 8 | -1.396604 | -2.397716 | -0.631482      |
| 11            | 6 | -1.592501 | -1.217072 | -0.394955      |
| 12            | 6 | -2.939072 | -0.612027 | -0.180216      |
| 13            | 6 | -3.112641 | 0.727781  | 0.194933       |
| 14            | 6 | -4.396811 | 1.247601  | 0.356799       |
| 15            | 6 | -5.519679 | 0.436890  | 0.149833       |
| 16            | 6 | -5.349555 | -0.900647 | -0.218573      |
| 17            | 6 | -4.064388 | -1.422240 | -0.384043      |
| 18            | 8 | 0.129559  | 2.561223  | 0.389290       |
| 19            | 6 | -0.041653 | 3.853480  | -0.233338      |
| 20            | 6 | 4.965851  | 0.155042  | -0.047967      |
| 21            | 1 | 0.555697  | 0.385774  | 1.499585       |
| 22            | 6 | 2.766412  | -1.389496 | 1.504447       |
| 23            | 1 | 3.105201  | 0.797679  | 1.705632       |
| 24            | 1 | 4.010437  | -2.736345 | 0.275802       |
| 25            | 1 | 2.282227  | -2.997386 | 0.060571       |
| 26            | 1 | 3.733648  | -1.451211 | -1.746744      |
| 27            | 1 | 1.649758  | -0.122570 | -2.240041      |
| 28            | 1 | 1.255581  | -1.832180 | -2.021648      |
| 29            | 1 | 0.548731  | -1.511427 | 0.282020       |
| 30            | 1 | -2.236943 | 1.335457  | 0.387585       |
| 31            | 1 | -4.525708 | 2.284985  | 0.658194       |
| 32            | 1 | -6.519410 | 0.845295  | 0.279861       |
| 33            | 1 | -6.216723 | -1.537166 | -0.379050      |
| 34            | 1 | -3.914270 | -2.458774 | -0.670313      |
| 35            | 1 | 5.471890  | 0.113904  | -1.015266      |
| 36            | 1 | 5.298100  | -0.673882 | 0.577842       |
| 37            | 1 | 5.192194  | 1.103592  | 0.444018       |
| 38            | 1 | 0.819809  | 4.492343  | -0.024161      |
| 39            | 1 | -0.161117 | 3.732913  | -1.312514      |
| 40            | 1 | -0.947107 | 4.263199  | 0.212706       |
| 41            | 1 | 3.578534  | -1.499620 | 2.230233       |
| 42            | 1 | 1.830294  | -1.671911 | 1.998477       |
| 43            | 8 | 2.029737  | 2.276259  | -0.774406      |
| 44            | 7 | 3.498140  | 0.070189  | -0.268084      |
| 45            | 8 | -0.853422 | -0.983595 | 1.793667       |
| 46            | 1 | -1.528225 | -1.415790 | 2.339471       |
| B3LYP/6-31+G* |   |           |           | -1092.49274060 |

**TS1<sub>ben-Si</sub>**

|   |   |          |           |           |
|---|---|----------|-----------|-----------|
| 1 | 6 | 2.926532 | -0.194760 | 0.836503  |
| 2 | 6 | 2.445198 | -2.529371 | 0.182368  |
| 3 | 6 | 2.411366 | -1.573817 | -1.031126 |

|               |   |           |           |                |
|---------------|---|-----------|-----------|----------------|
| 4             | 1 | 3.149919  | 0.429016  | -1.121284      |
| 5             | 6 | 1.726765  | 1.907114  | 0.076515       |
| 6             | 6 | 1.584573  | 0.576037  | 0.782762       |
| 7             | 8 | -0.706133 | 0.285993  | -0.144820      |
| 8             | 6 | 1.037806  | -0.936898 | -1.239250      |
| 9             | 6 | 0.536870  | -0.344028 | 0.080038       |
| 10            | 6 | -1.682330 | -0.152875 | 0.767358       |
| 11            | 8 | -1.151513 | -2.341403 | 0.069119       |
| 12            | 6 | -3.053009 | -0.137244 | 0.182406       |
| 13            | 6 | -4.144149 | -0.103075 | 1.061909       |
| 14            | 6 | -5.449334 | -0.071328 | 0.566860       |
| 15            | 6 | -5.675027 | -0.066774 | -0.812930      |
| 16            | 6 | -4.587402 | -0.098205 | -1.693977      |
| 17            | 6 | -3.283282 | -0.135058 | -1.200740      |
| 18            | 8 | 1.011042  | 2.872320  | 0.636604       |
| 19            | 6 | 0.962374  | 4.142266  | -0.052092      |
| 20            | 6 | 4.808767  | -0.760366 | -0.763786      |
| 21            | 1 | 1.231728  | 0.752068  | 1.802687       |
| 22            | 6 | 2.787528  | -1.624525 | 1.405235       |
| 23            | 1 | 3.705536  | 0.397756  | 1.325345       |
| 24            | 1 | 3.196117  | -3.315470 | 0.051256       |
| 25            | 1 | 1.462740  | -3.004909 | 0.286470       |
| 26            | 1 | 2.805287  | -2.012511 | -1.952354      |
| 27            | 1 | 1.073965  | -0.189684 | -2.044000      |
| 28            | 1 | 0.306958  | -1.713714 | -1.494437      |
| 29            | 1 | 0.332761  | -1.186979 | 0.745280       |
| 30            | 1 | -3.950865 | -0.106534 | 2.130291       |
| 31            | 1 | -6.289365 | -0.048457 | 1.257339       |
| 32            | 1 | -6.691061 | -0.042946 | -1.200464      |
| 33            | 1 | -4.758436 | -0.105681 | -2.768092      |
| 34            | 1 | -2.437301 | -0.190870 | -1.875311      |
| 35            | 1 | 5.014226  | -0.931058 | -1.822883      |
| 36            | 1 | 5.062836  | -1.654229 | -0.193211      |
| 37            | 1 | 5.396590  | 0.088804  | -0.407801      |
| 38            | 1 | 1.964451  | 4.572180  | -0.123374      |
| 39            | 1 | 0.544180  | 4.004789  | -1.051665      |
| 40            | 1 | 0.311334  | 4.767671  | 0.557270       |
| 41            | 1 | 3.722412  | -1.934037 | 1.883981       |
| 42            | 1 | 2.006391  | -1.656606 | 2.169038       |
| 43            | 8 | 2.413435  | 2.076838  | -0.935384      |
| 44            | 7 | 3.363527  | -0.448704 | -0.604942      |
| 45            | 8 | -1.440081 | -0.177579 | 1.963595       |
| 46            | 1 | -1.838560 | -2.889581 | 0.479266       |
| B3LYP/6-31+G* |   |           |           | -1092.49069486 |

**TS1<sub>met</sub>**

|    |   |           |           |           |
|----|---|-----------|-----------|-----------|
| 1  | 6 | -2.747811 | -0.258630 | -0.872243 |
| 2  | 6 | -1.295589 | 0.262854  | -0.863559 |
| 3  | 6 | -2.944913 | -1.702377 | -1.382045 |
| 4  | 1 | -3.381782 | 0.499996  | -1.328088 |
| 5  | 7 | -3.140603 | -0.360885 | 0.597421  |
| 6  | 6 | -2.820357 | -2.614232 | -0.125571 |
| 7  | 6 | -2.447978 | -1.643837 | 1.016204  |
| 8  | 6 | -1.161912 | 1.575017  | -0.053872 |
| 9  | 6 | -0.398814 | -0.844142 | -0.260926 |
| 10 | 6 | -4.612430 | -0.298070 | 0.825461  |
| 11 | 1 | -0.995247 | 0.460501  | -1.896686 |
| 12 | 1 | -3.932341 | -1.803452 | -1.843072 |
| 13 | 1 | -2.212903 | -1.952139 | -2.155601 |
| 14 | 8 | 0.940126  | -0.328430 | -0.105795 |
| 15 | 6 | -0.934526 | -1.371896 | 1.085963  |
| 16 | 1 | -3.764764 | -3.125954 | 0.085947  |
| 17 | 1 | -2.054897 | -3.388021 | -0.235004 |
| 18 | 1 | -2.830516 | -1.950808 | 1.993760  |
| 19 | 1 | -0.335787 | -1.671376 | -0.971988 |
| 20 | 1 | -4.804301 | -0.424567 | 1.894173  |
| 21 | 1 | -5.115705 | -1.084611 | 0.260679  |
| 22 | 1 | -4.908988 | 0.700121  | 0.489497  |
| 23 | 6 | 1.960524  | -1.215981 | -0.183566 |
| 24 | 1 | -0.721107 | -0.635947 | 1.864724  |
| 25 | 1 | -0.424200 | -2.307300 | 1.338715  |
| 26 | 8 | 1.793708  | -2.412282 | -0.354062 |
| 27 | 6 | 3.291975  | -0.563665 | -0.040128 |
| 28 | 6 | 3.428116  | 0.822122  | 0.137064  |
| 29 | 6 | 4.433698  | -1.377877 | -0.089123 |
| 30 | 6 | 4.699366  | 1.383649  | 0.263317  |
| 31 | 6 | 5.701359  | -0.811760 | 0.037676  |
| 32 | 1 | 2.542736  | 1.447327  | 0.173287  |
| 33 | 1 | 4.309135  | -2.447323 | -0.227283 |
| 34 | 6 | 5.835591  | 0.569792  | 0.214211  |
| 35 | 1 | 4.803515  | 2.456782  | 0.399790  |
| 36 | 1 | 6.583554  | -1.445303 | -0.000865 |
| 37 | 1 | 6.824150  | 1.011286  | 0.313124  |
| 38 | 1 | -2.735297 | 0.482587  | 1.058278  |
| 39 | 8 | -1.143459 | 1.569955  | 1.181232  |
| 40 | 8 | -0.585276 | 2.545415  | -0.798723 |
| 41 | 8 | -3.336490 | 2.153931  | -0.292015 |
| 42 | 1 | -3.369439 | 3.116093  | -0.182728 |
| 43 | 6 | -0.327938 | 3.774248  | -0.109364 |
| 44 | 1 | -1.265173 | 4.195377  | 0.266729  |
| 45 | 1 | 0.355814  | 3.614613  | 0.729773  |
| 46 | 1 | 0.118727  | 4.438318  | -0.851201 |

B3LYP/6-31+G\*

-1092.52107808

**TS1<sub>ben</sub>-boat**

|    |   |           |           |           |
|----|---|-----------|-----------|-----------|
| 1  | 6 | 2.706540  | 0.194826  | -0.683316 |
| 2  | 6 | 3.822439  | -1.519211 | 0.702815  |
| 3  | 6 | 2.307851  | -1.768322 | 0.572850  |
| 4  | 7 | 2.011008  | -1.155588 | -0.794508 |
| 5  | 8 | 1.155059  | 2.328801  | -1.733764 |
| 6  | 6 | 1.860753  | 1.101681  | 0.250645  |
| 7  | 8 | -0.326140 | 0.140105  | 0.166125  |
| 8  | 6 | 1.442114  | -0.999512 | 1.604404  |
| 9  | 6 | 0.821640  | 0.294792  | 1.066305  |
| 10 | 8 | -0.577531 | -2.087553 | -0.072041 |
| 11 | 6 | -2.547745 | -0.729263 | -0.063784 |
| 12 | 6 | -3.197674 | 0.326643  | 0.590456  |
| 13 | 6 | -4.551136 | 0.555013  | 0.342377  |
| 14 | 6 | -5.254790 | -0.255502 | -0.558614 |
| 15 | 6 | -4.606334 | -1.312206 | -1.204302 |
| 16 | 6 | -3.254463 | -1.554299 | -0.951253 |
| 17 | 8 | 0.625203  | 3.102925  | 0.325492  |
| 18 | 6 | -0.180380 | 4.150009  | -0.252225 |
| 19 | 6 | 2.427865  | -1.973032 | -1.966699 |
| 20 | 1 | 2.526795  | 1.570692  | 0.984534  |
| 21 | 6 | 4.078966  | -0.201822 | -0.090340 |
| 22 | 1 | 2.763253  | 0.634385  | -1.680523 |
| 23 | 1 | 4.402083  | -2.347473 | 0.280912  |
| 24 | 1 | 4.104078  | -1.439484 | 1.755520  |
| 25 | 1 | 2.031433  | -2.822771 | 0.530467  |
| 26 | 1 | 0.624137  | -1.588977 | 2.024617  |
| 27 | 1 | 2.068988  | -0.702970 | 2.454037  |
| 28 | 1 | 0.418186  | 0.839342  | 1.919488  |
| 29 | 1 | -2.630554 | 0.876453  | 1.336720  |
| 30 | 1 | -5.067095 | 1.357846  | 0.863446  |
| 31 | 1 | -6.309158 | -0.068754 | -0.750259 |
| 32 | 1 | -5.150492 | -1.945933 | -1.900601 |
| 33 | 1 | -2.737822 | -2.375827 | -1.439111 |
| 34 | 1 | 1.872265  | -2.912269 | -1.939252 |
| 35 | 1 | 3.499685  | -2.168696 | -1.931313 |
| 36 | 1 | 2.181261  | -1.423094 | -2.877721 |
| 37 | 1 | -0.581953 | 4.700077  | 0.598608  |
| 38 | 1 | 0.434378  | 4.798685  | -0.881539 |
| 39 | 1 | -0.987168 | 3.712483  | -0.844787 |
| 40 | 1 | 4.815389  | -0.359200 | -0.885040 |
| 41 | 1 | 4.467093  | 0.600331  | 0.542473  |
| 42 | 6 | 1.182038  | 2.230507  | -0.521818 |
| 43 | 6 | -1.101119 | -0.992421 | 0.128273  |

|               |   |           |                |           |
|---------------|---|-----------|----------------|-----------|
| 44            | 8 | -1.108800 | -0.312861      | 2.689148  |
| 45            | 1 | -1.688531 | -0.448225      | 3.454816  |
| 46            | 1 | 0.984976  | -1.056119      | -0.848263 |
| B3LYP/6-31+G* |   |           | -1092.47550320 |           |
